# Supplementary material
Source: Research Square preprint supplement (doi:10.21203/rs.3.rs-10187651/v1)
Supplement: Supplementary file 1 [file 51a16a6f3ca61161f983459a.docx]

Table S1. The initial number of participants enrolled in each NHANES survey cycle

| NHANES cycle | The total number of participants enrolled |
| --- | --- |
| 1999-2000 | 9965 |
| 2001-2002 | 11039 |
| 2003-2004 | 10122 |
| 2005-2006 | 10348 |
| 2007-2008 | 10149 |
| 2009-2010 | 10537 |
| 2011-2012 | 9756 |
| 2013-2014 | 10175 |
| 2015-2016 | 9971 |
| 2017-2018 | 9254 |

Table S2. Methods for evaluating CKM stages 0-3

| CKM stages | Definition | Criterion |
| --- | --- | --- |
| Stage 0: No  CKM risk factors | Individuals with normal BMI and waist circumference, normoglycemia, normotension, normal lipid, and no evidence of CKD or subclinical or clinical CVD | All criteria are met:   1. BMI <25 kg/m2 (or <23 kg/m2 if Asian ancestry) 2. Waist circumference <88/102 cm in female/male (or if Asian ancestry <80/90 cm in female/male) 3. Fasting blood glucose <100 mg/dL and HbA1c <5.7% and without self-reported diagnosis of diabetes, use of insulin, or oral hypoglycemic agents 4. SBP <130 mm Hg and DBP <80 mm Hg without self-reported diagnosis of hypertension or use of antihypertensive medications 5. HDL cholesterol ≥50/40 mg/dL in female/male and triglycerides <135 mg/dL 6. Low-risk CKD in KDIGO classfication according to eGFR and UACR: UACR <30 mg/g and eGFR ≥60 ml/min/1.73m2 7. Predicted 10-year CVD risk <20% (PREVENT equations)* 8. No clinical CVD (history of chronic heart failure, coronary heart disease, heart attack, or stroke) |
| Stage 1: Excess  or dysfunctional  adiposity | Individuals with overweight/obesity, abdominal obesity, or dysfunctional adipose tissue, without the presence of other metabolic risk factors or CKD | Any of the three criteria is met:   1. Overweight/obesity: BMI ≥25 kg/m2 (or ≥23 kg/m2 if Asian ancestry) 2. Abdominal obesity: Waist circumference ≥88/102 cm in women/ men (or if Asian ancestry ≥80/90 cm in women/men) 3. Prediabetes: Fasting blood glucose ≥100–124 mg/dL or HbA1c between 5.7% and 6.4%   All criteria are met:   1. SBP <130 mm Hg and DBP <80 mm Hg without self-reported diagnosis of hypertension or use of antihypertensive medications 2. HDL cholesterol ≥50/40 mg/dL in female/male and triglycerides <135 mg/dL 3. No diabetes 4. Low-risk CKD in KDIGO classification 5. Predicted 10-year CVD risk <20% 6. No clinical CVD |
| Stage 2: Metabolic risk factors and CKD | Individuals with metabolic risk factors (hypertriglyceridemia, hypertension, MetS, diabetes), or CKD | Any of the five criteria is met:   1. Hypertriglyceridemia: Triglycerides ≥135 mg/dL 2. Hypertension: SBP ≥130 mm Hg or DBP ≥80 mmHg or self-reported diagnosis of hypertension or use of antihypertensive medications 3. Diabetes: Fasting blood glucose ≥125 mg/dL or HbA1c ≥6.5% or self-reported diagnosis of diabetes, use of insulin, or oral hypoglycemic agents 4. MetS: MetS is defined by the presence of 3 or more of the following: 1) Waist circumference ≥88/102 cm in female/male (or if Asian ancestry ≥80/90 cm in female/male). 2) HDL cholesterol ≥50/40 mg/dL in female/male. 3) Triglycerides ≥150 mg/dL. 4) Elevated blood pressure (SBP ≥130 mmHg or DBP ≥80 mmHg and/or use of antihypertensive medications). 5) Fasting blood glucose ≥100 mg/dL 5. Moderate-to-high-risk CKD in KDIGO classification: UACR ≥30 mg/g and eGFR ≥60 ml/min/1.73m2, UACR <300 mg/g and eGFR ≤ 45-59 ml/min/1.73m2, or UACR <30 mg/g and eGFR ≤ 30-44 ml/min/1.73m2   All criteria are met   1. No very high-risk CKD in KDIGO classification (very high-risk CKD in KDIGO classification: UACR ≥300 mg/g and eGFR ≤45-59 ml/min/1.73m2, UACR ≥30 mg/g and eGFR ≤30-44 ml/min/1.73m2, or eGFR ≤29 ml/min/1.73m2) 2. Predicted 10-year CVD risk <20% 3. No clinical CVD |
| Stage 3: Subclinical CVD in CKM | Subclinical CVD among individuals with excess/dysfunctional adiposity, other metabolic risk factors, or CKD | Any of the two criteria is meet:   1. Very high-risk CKD in KDIGO classification 2. Predicted 10-year CVD risk ≥20%   Or any of the following criteria is met：   1. Overweight/obesity 2. Abdominal obesity 3. Hypertriglyceridemia 4. Hypertension 5. Prediabetes or diabetes 6. MetS 7. Moderate-to-high-risk CKD in KDIGO classification   The criteria must met:   1. No clinical CVD |

BMI: body mass index; CKD: chronic kidney disease; CKM: cardiovascular-kidney-metabolic; CVD: cardiovascular disease; SBP: systolic blood pressure; DBP: diastolic blood pressure; eGFR: estimated glomerular filtration rate; HbA1c: glycated hemoglobin type a1c; HDL: high-density lipoprotein; KDIGO: kidney disease: improving global outcomes; MetS: metabolic syndrome; UACR: urine albumin-to-creatinine ratio.

*The 10-year risk of cardiovascular disease was calculated using the AHA's Predicting Risk of CVD EVENTs (PREVENT) equations. A threshold of ≥20% was used to define high risk, as recommended by the AHA [https://professional.heart.org/en/guidelines and-statements/prevent-calculator]).
