# Supplementary material
Source: Research Square preprint supplement (doi:10.21203/rs.3.rs-10187651/v1)

**Graphical abstract**


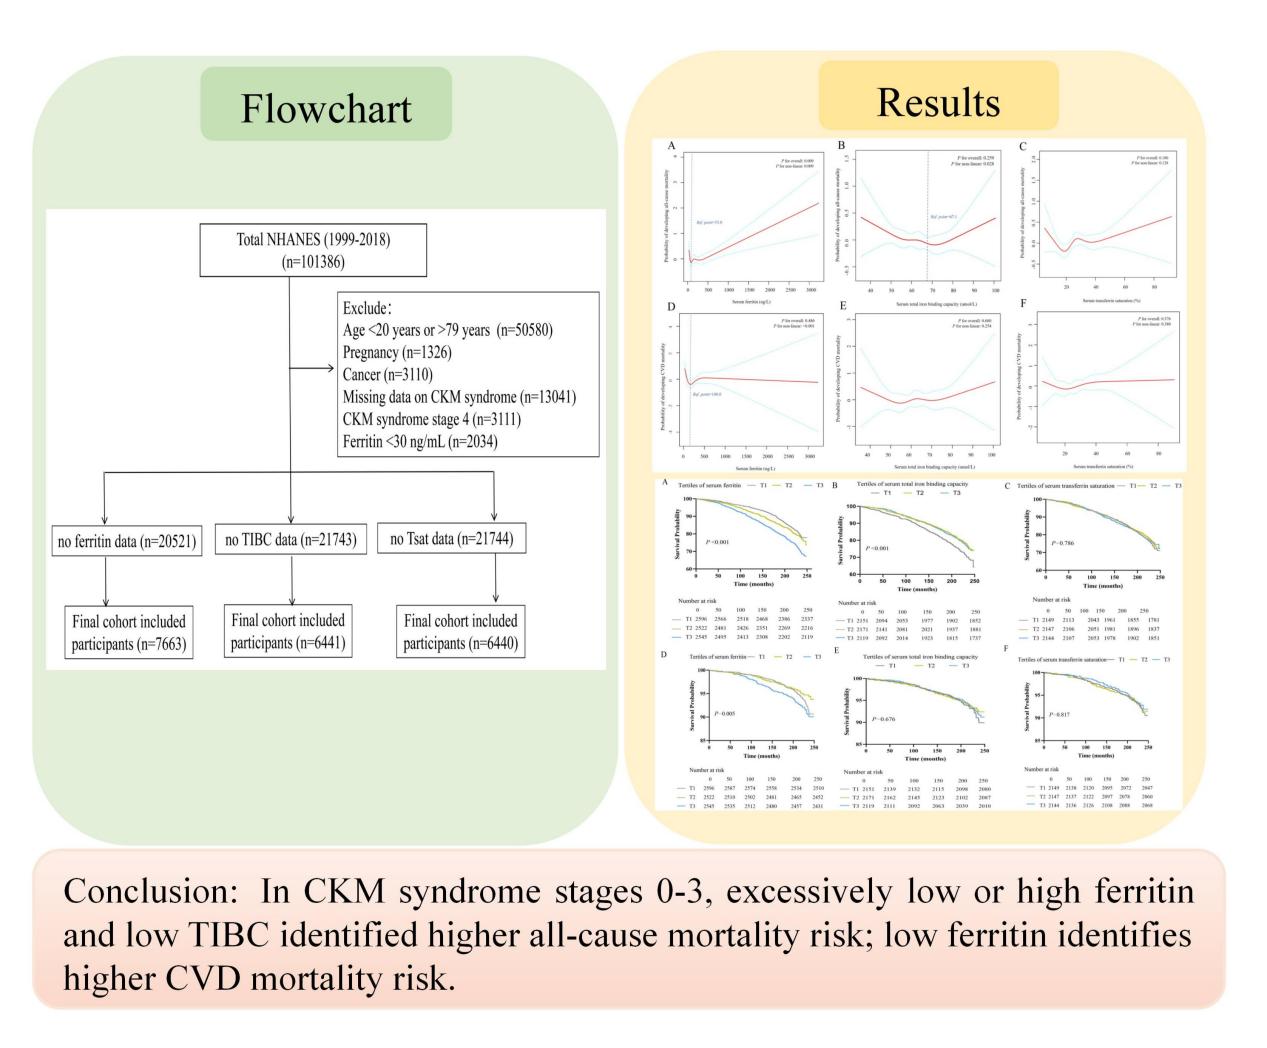

Supplement: Supplementary file 2 [file cbda42130f6fa553bc577fa8.docx]
